# Supplementary material
Source: Elsevier journal article supplement (https://www.sciencedirect.com/science/article/pii/S1578219018302713)
Supplement: mmc1 [file S1578219018302713:mmc1.pdf]

## Tratamientos sistémicos en psoriasis moderada-grave en niños y adolescentes:

efectividad y seguridad según datos de estudios descriptivos.<sup>10-12,14,15,17-30</sup>

| Tratamientos sistémicos en psoriasis moderada-grave en niños y adolescentes: efectividad y seguridad según datos de estudios descriptivos. |                                      |                                                                                                                                                                                                                                                                               |                                                                                                                                                                                                                                                                               |
|--------------------------------------------------------------------------------------------------------------------------------------------|--------------------------------------|-------------------------------------------------------------------------------------------------------------------------------------------------------------------------------------------------------------------------------------------------------------------------------|-------------------------------------------------------------------------------------------------------------------------------------------------------------------------------------------------------------------------------------------------------------------------------|
| Referencia                                                                                                                                 | Población                            | Efectividad                                                                                                                                                                                                                                                                   | Efectos adversos                                                                                                                                                                                                                                                              |
| Garber C, et al. <sup>10</sup>                                                                                                             | n=27<br>(56 ciclos)<br>(≤18 años)    | Aclaramiento:<br>- ADA (4/6) y ETN (6/9): 66,7%<br>- UST (1/3): 33,3%<br>- Convencionales: 0/28 (0%)<br>S-MAPA 50%<br>- UVBBE 3/3 (100%), MTX 4/11 (36,4%), CsA 2/3 (66,7%), ADA 6/6 (100%), ETN 7/9 (77,8%), UST 2/3 (66,7), combinaciones (biológico + MTX/CsA): 4/4 (100%) | Más frecuentes:<br>- MTX: 16% infec. menores, 16% GI, 11% alteración PFH<br>- ADA: 25% infec. menores<br>- ETN: 33% infec. menores<br>Motivaron suspensión: 2/56 (3,6%)<br>- MTX 1/19 (5%)<br>- UST 1/3 (33%)                                                                 |
| Klufas DM, et al. <sup>14</sup>                                                                                                            | n= 51<br>(80 ciclos)<br>(≤18 años)   | PGA, 5-7 meses y 12 meses<br>- Todos los grupos de tratamiento alcanzan respuesta positiva                                                                                                                                                                                    | 29/80 (36%), menores y subjetivos.<br>Efecto adverso más frecuente: fatiga (7,5%).<br>“Pocos ciclos de tratamiento suspendidos por efectos adversos” (no dan porcentaje exacto).                                                                                              |
| Charbit L, et al. <sup>11</sup>                                                                                                            | n= 154<br>(261 ciclos)<br>(<18 años) | PASI≥50: 59% de los sistémicos.<br>- Fototerapia + actitret mejores tasas de respuesta                                                                                                                                                                                        | 88/261 (33,7%)<br>- Más frecuentes: acitretino (52/116, 45%)<br>Motivaron suspensión: 15/261 (5,7%)<br>.CsA: 5/25 (20%)<br>.MTX: 4/48 (8,3%)<br>.Acitret: 6/142 (4,2%)                                                                                                        |
| DI Lerner V, et al. <sup>12</sup>                                                                                                          | n=58<br>(92 ciclos)<br>(< 18 años)   | No claramente especificada.<br>Se indican datos de suspensión por remisión completa, pero no se mide efectividad directamente.                                                                                                                                                | Motivaron suspensión: 19/92 (10,9%)<br>- PUVA: ninguno<br>- MTX: 1 /13 (7,7%): elevación transaminasas<br>- CsA: 8/38 (21,1%): GI, cefalea, elevación de Cr o Tg, piodermatitis, hipertrichosis<br>- Acitret: 1 /18 (5,6%): artralgias<br>- ETN: ninguno                      |
| Bronckers IMGJ, et al. <sup>13</sup>                                                                                                       | n=390 (482 ciclos)<br>(< 18 años)    | La evaluación de la efectividad no es un objetivo de este trabajo                                                                                                                                                                                                             | Menos frecuentes con anti-TNF que con MTX<br>- MTX: 130/270 (48,1%): ≥1 (GI: n=67)<br>- Biológicos: 41/106 (38,7%): 20/106 (18,9%): reacción local<br>- Acitret 38/57 (66,7%)<br>- Fumaratos 13/19 (68,4%)<br>- CsA 11/30 (36,7%)<br>Graves:<br>- MTX: n=3; EAF n=2; ADA: n=1 |

|                                  |                                                                       |                                                                                                                                                                                                                                        |                                                                                                                                                                                                                                                                                                                                                    |
|----------------------------------|-----------------------------------------------------------------------|----------------------------------------------------------------------------------------------------------------------------------------------------------------------------------------------------------------------------------------|----------------------------------------------------------------------------------------------------------------------------------------------------------------------------------------------------------------------------------------------------------------------------------------------------------------------------------------------------|
|                                  |                                                                       |                                                                                                                                                                                                                                        | Motivaron suspensión: 47/390 (9,75%):<br>- MTX: 33/270 (12,2%)<br>- CsA: 3/30 (10%)<br>- Acitret: 6/57 (10,5%)<br>- Biológicos: 3/106 (2,8%)<br>- Fumaratos: 2/19 (10,5%)                                                                                                                                                                          |
| Van Geel MJ, et al <sup>15</sup> | n=25<br>MTX<br>( $< 18$ años)                                         | PASI $\geq 75$ :<br>- Semana 12: 4,3% <sup>u</sup> / 4% <sup>#</sup><br>- Semana 24: 33,3% <sup>u</sup> / 32% <sup>#</sup><br>- Semana 36: 40% <sup>u</sup> / 40% <sup>#</sup><br>- Semana 48: 28,6% <sup>u</sup> / 28,6% <sup>#</sup> | Más frecuentes: náuseas graves (5/25, 20%), infecciones (5/25, 20%) y astenia (4/25, 16%)<br>Suspensión: 6/25 (24%)                                                                                                                                                                                                                                |
| Kaur, et al <sup>19</sup>        | n=24<br>MTX<br>( $< 18$ años)                                         | PASI $\geq 75$ :<br>- 22/24 (91,7%)<br>PASI 50-75<br>- 2/24 (8,3%)                                                                                                                                                                     | 9/24 (37,5%) efectos adversos leves: náuseas, vómitos, pérdida de apetito. No derivaron en suspensión                                                                                                                                                                                                                                              |
| Collin, et al <sup>20</sup>      | n=13<br>MTX<br>(3-15 años)                                            | Buena respuesta (definida como aclaramiento dejando mínima enfermedad residual)<br>- 11/13 (84,6%)                                                                                                                                     | Más frecuentes: GI: 6/13 (46,2%)<br>Suspensión: 1/13 (7,7%) <sup>‡</sup> : alteración de PFH                                                                                                                                                                                                                                                       |
| Di Lerna V, et al. <sup>17</sup> | n=18<br>Acitret<br>( $< 17$ años)                                     | PASI $\geq 75$ :<br>- 8/18 (44,4%) semana 16                                                                                                                                                                                           | Más frecuentes mucocutáneos: 18/18 (100%): se manejaron con ajuste de dosis<br>Suspensión: 1/18 (5,5%): artralgias                                                                                                                                                                                                                                 |
| Dogra S, et al. <sup>21</sup>    | n=10<br>CsA<br>( $< 18$ años)                                         | PASI $\geq 75$ :<br>- 5/8 (62,5%) semana 4                                                                                                                                                                                             | 2/8 (25%): dolor abdominal, elevación Cr<br>No motivaron suspensión                                                                                                                                                                                                                                                                                |
| Ergun T, et al. <sup>18</sup>    | n=226<br>Acitret (n=61)<br>MTX (n=85)<br>CsA (n=80)<br>( $< 18$ años) | PASI $\geq 75$ :<br>- 29/61 (47,5%) acitret<br>- 29/85 (34,1%) MTX<br>- 32/80 (40%) CsA                                                                                                                                                | Efectos adversos menores:<br>- Acitret: 29,3%: mucocutáneos (25,9%), hiperlipemia (1,7%), náuseas (1,7%)<br>- MTX: 9,2%: náuseas, vómitos (8%), alteración de PFH (1,1%)<br>- CsA: 22,5%: hiperlipemia (3,8%), elevación Cr (1,3%), GI (1,3%) y citopenia (1,3%)<br>Suspensión:<br>- 1/61 (1,7%) acitret<br>- 1/85 (1,1%) MTX<br>- 2/80 (2,5%) CsA |
| Di Lerna V, et al. <sup>16</sup> | n=23<br>ETN<br>( $< 18$ años)                                         | PASI $\geq 75$ :<br>- 56,5% semana 12<br>- 65,2% semana 24<br>- 52,1% semana 52                                                                                                                                                        | Más frecuentes:<br>- 2/23 (8,7%): reacción lugar inyección<br>- 8/23 (34,7%): dolor leve área de inyección<br>No motivaron suspensión                                                                                                                                                                                                              |
| Ersoy-Evans et al* <sup>22</sup> | n=28<br>UVBBE<br>( $< 18$ años)                                       | Mejoría mayor del 75%: 26/28 (92,9%)                                                                                                                                                                                                   | Eritema 51,6%*<br>Prurito 18%*<br>Quemazón 9%*                                                                                                                                                                                                                                                                                                     |
| Ersoy-Evans et al* <sup>22</sup> | n=30<br>UVB<br>( $< 18$ años)                                         | Mejoría mayor del 75%: 28/30 (93,3%)                                                                                                                                                                                                   |                                                                                                                                                                                                                                                                                                                                                    |

|                                  |                                    |                                                                            |                                                                                                                                                                                 |
|----------------------------------|------------------------------------|----------------------------------------------------------------------------|---------------------------------------------------------------------------------------------------------------------------------------------------------------------------------|
| Ersoy-Evans et al <sup>*22</sup> | n=7<br>PUVA<br>(< 18 años)         | Mejoría mayor del 75%: 5/7 (71,4%)                                         |                                                                                                                                                                                 |
| Jain et al <sup>23</sup>         | n=20<br>UVBBE<br>(6-14 años)       | Semana 12:<br>PASI $\geq$ 90: 12/20 (60%)<br>PASI 70-90: 3/20 (15%)        | Eritema leve: 2/20 (10%)                                                                                                                                                        |
| Pasic et al <sup>24</sup>        | n=20<br>UVBBE<br>(6-14 años)       | PASI $\geq$ 90: 9/20 (45%)<br>PASI 70-90: 4/20 (20%)                       | Ninguno                                                                                                                                                                         |
| Zamberk et al <sup>25</sup>      | n=20<br>UVBBE<br>(5-17 años)       | PASI90: 52,2%<br>PASI75-90: 17,4%                                          | 35%: mayoritariamente eritema (no indican valor exacto)<br>No motivaron suspensión                                                                                              |
| Pavlovsky et al <sup>26</sup>    | n=79<br>UVBBE<br>( $\leq$ 18 años) | Aclaramiento: 40/79 (50,6%)<br>Mejoría $\geq$ 75%: 33/79 (41,8%)           | 18/79 (22,8%):<br>- Eritema leve (13/18, 72,2%),<br>prurito (2/18, 11,1%),<br>quemadura de primer grado (3/18, 16,7%)                                                           |
| Jury et al <sup>27</sup>         | n=35<br>UVBBE<br>( $\leq$ 16 años) | Aclaramiento o enfermedad residual mínima: 22/35 (62,9%)                   | Eritema (23/77, 28,6%), ampollas (5/77, 6,5%), herpes zóster (1/77, 1,3%), ansiedad (5/77, 6,5%) <sup>‡</sup>                                                                   |
| Tan et al <sup>‡</sup><br>28     | n=38<br>UVBBE<br>(<16 años)        | Mejoría del 75% o aclaramiento: 90%                                        | Eritema leve (36%) <sup>‡</sup><br>No motivaron suspensión                                                                                                                      |
| Eustace et al <sup>29</sup>      | n=21<br>UVBBE<br>( $\leq$ 17 años) | Aclaramiento (PASI90 o PGA0-1): 86,7%                                      | Eritema (5/21, 23,8%), VHS (2/21, 9,5%)                                                                                                                                         |
| Wong et al <sup>30</sup>         | n=12<br>UVBBE                      | Mejoría en BSA $\geq$ 90%: 5/10 (50%)<br>Mejoría en BSA 70-90%: 4/10 (40%) | Quemadura leve (1/12, 8,3%), quemazón (1/12, 8,3%), prurito (2/12, 16,7%), dolor (2/12, 16,7%), eritema 2/12, 16,7%).<br>Suspensión: 1/12 (8,3%): aumento progresivo de eritema |

<sup>‡</sup>As treated (por tratamiento). <sup>#</sup>Last observation carried forward (traslación de los datos según la última observación disponible).

<sup>‡</sup>2/18 (11,1%) si se consideran todos los ciclos de tratamiento (n=18).

<sup>\*‡</sup>Trabajos que incluyen pacientes con psoriasis y otras dermatosis (n=113\*, n=77<sup>‡</sup>, n=116<sup>‡</sup>); los efectos adversos corresponden al total de los pacientes incluidos en dichos estudios (no se indican los datos específicos del grupo de psoriasis).

♀ : mujer; acitret: acitretino; ADA: adalimumab; CsA: ciclosporina; BSA: *body surface index*; Cr: creatinina; EAM: ésteres de ácido fumárico; ETN: etanercept; GI: gastrointestinales; MTX: metotrexato; n: número de pacientes; PASI: *psoriasis area and severity index*; PFH: pruebas de función hepática; PGA: *physician global assessment*; PUVA: ultravioleta A y psoraleno; S-MAPA: *simple measure for assessing psoriasis*
